# Supplementary material
Source: ML conference proceedings conference paper supplement (https://openreview.net/forum?id=oALqqvTcMt)

A. Sample Distribution Across Organ Systems

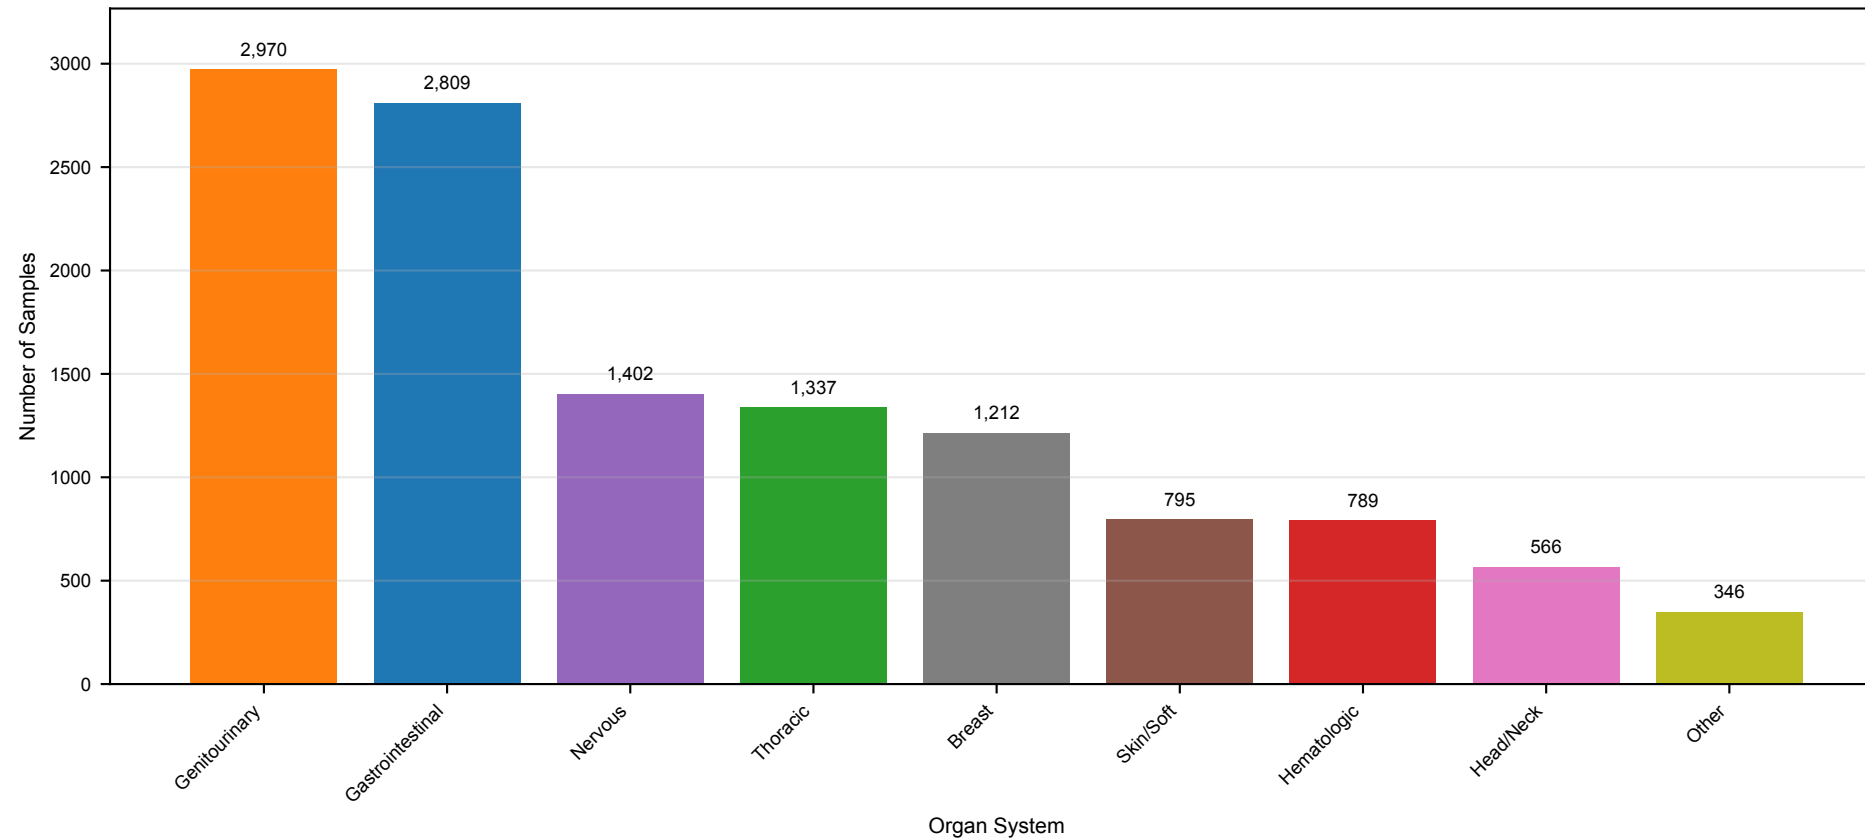

B. Hierarchical Structure

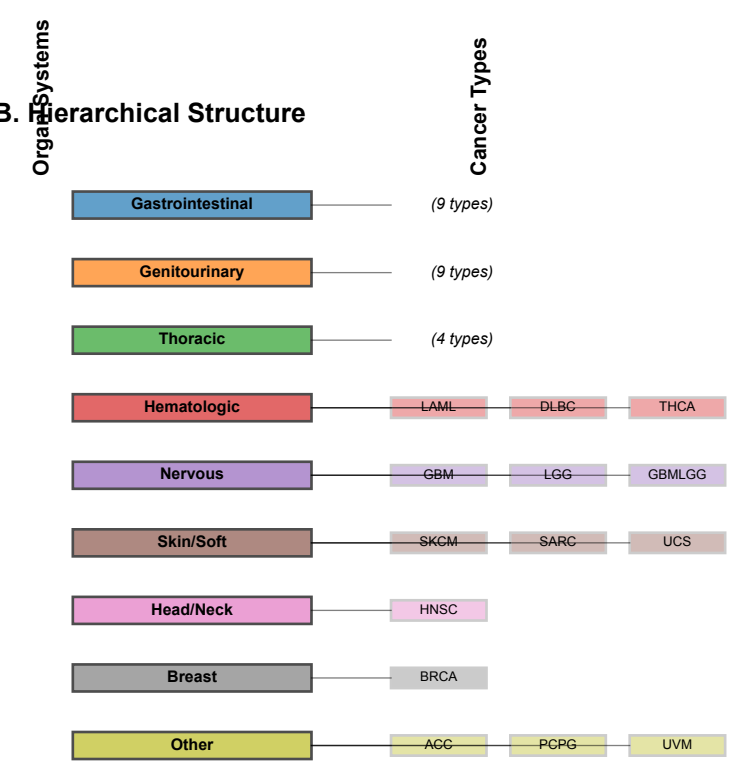

C. Pathway Signature Correlation Matrix

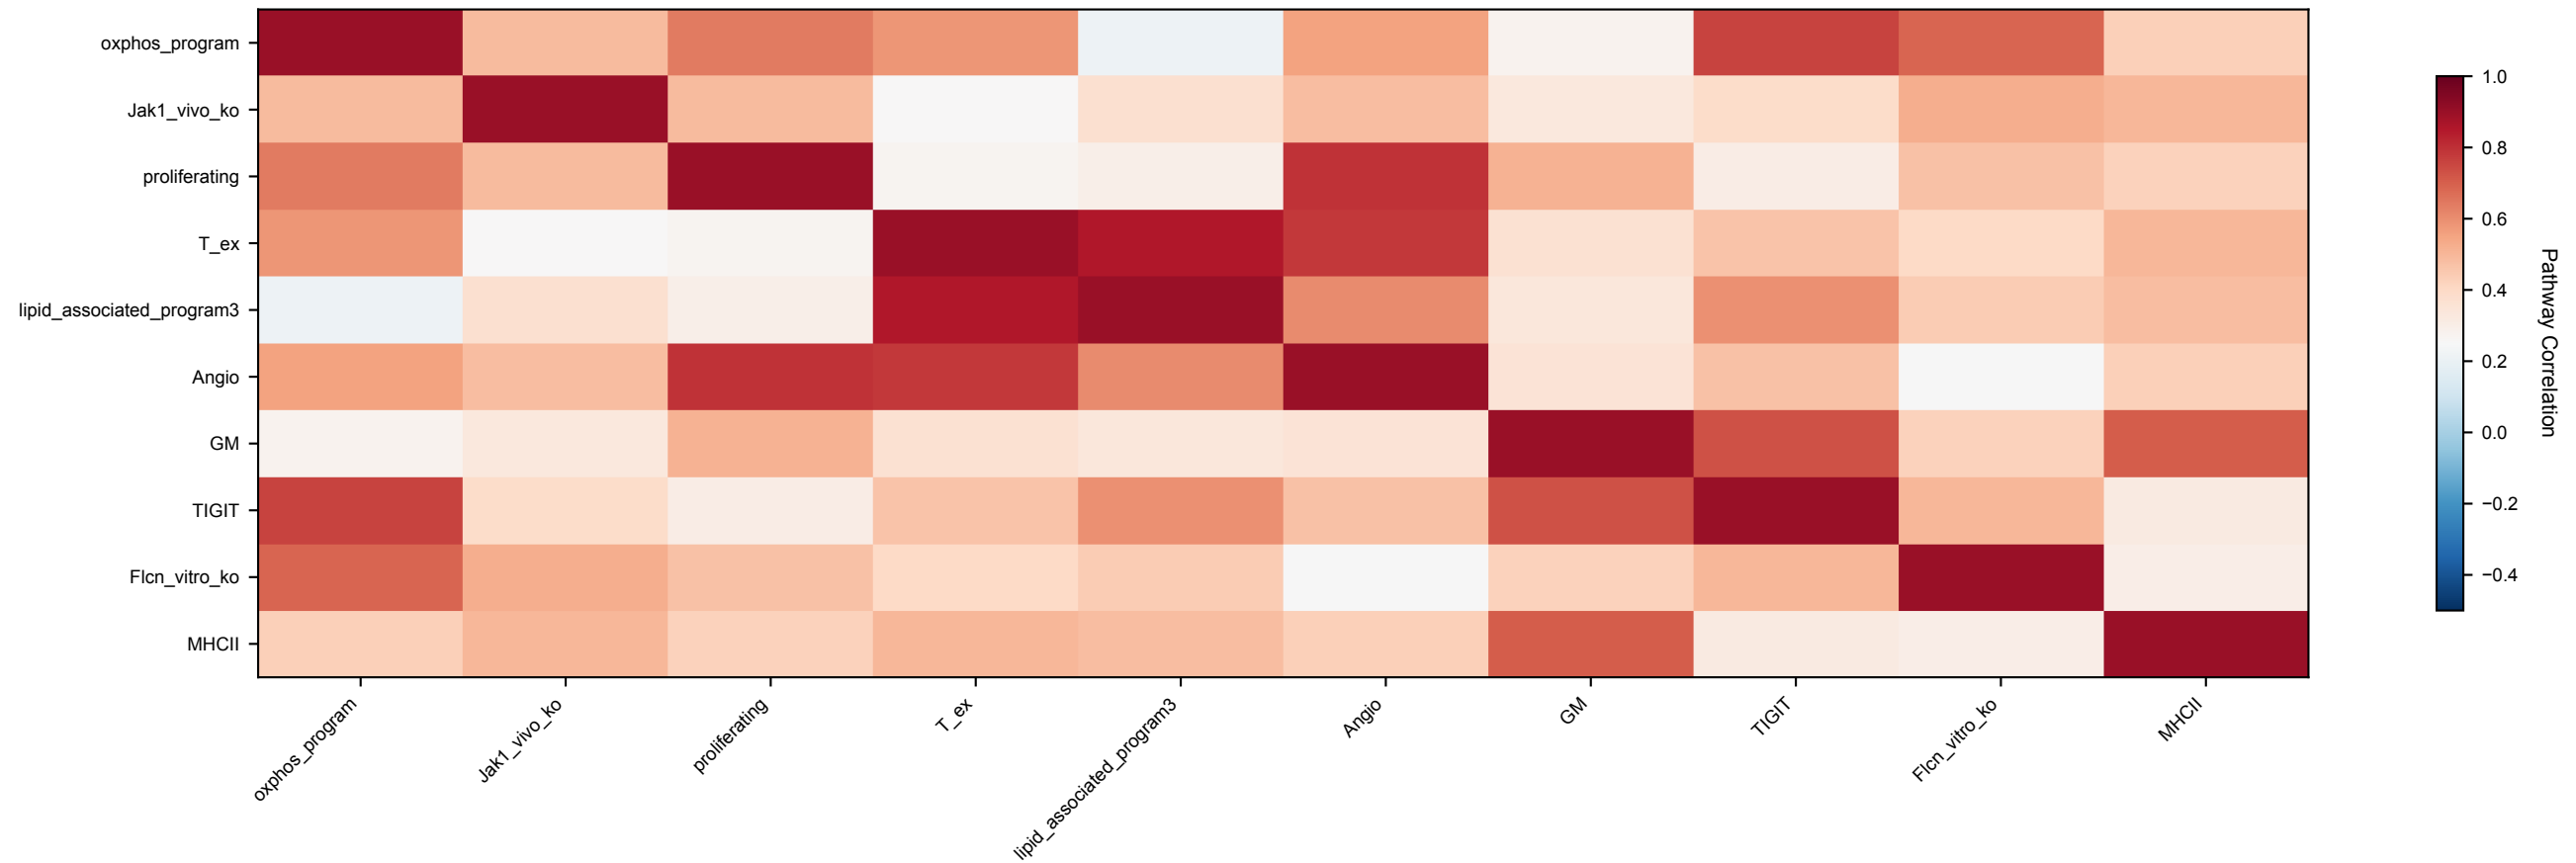

Supplement: supplementary_material [file Figure1_Dataset_Overview.pdf › SupplementaryMaterials/code/Figure1_Dataset_Overview.pdf]
