# Supplementary material
Source: ML conference proceedings conference paper supplement (https://openreview.net/forum?id=oALqqvTcMt)

A. Cancer Type Similarity Matrix

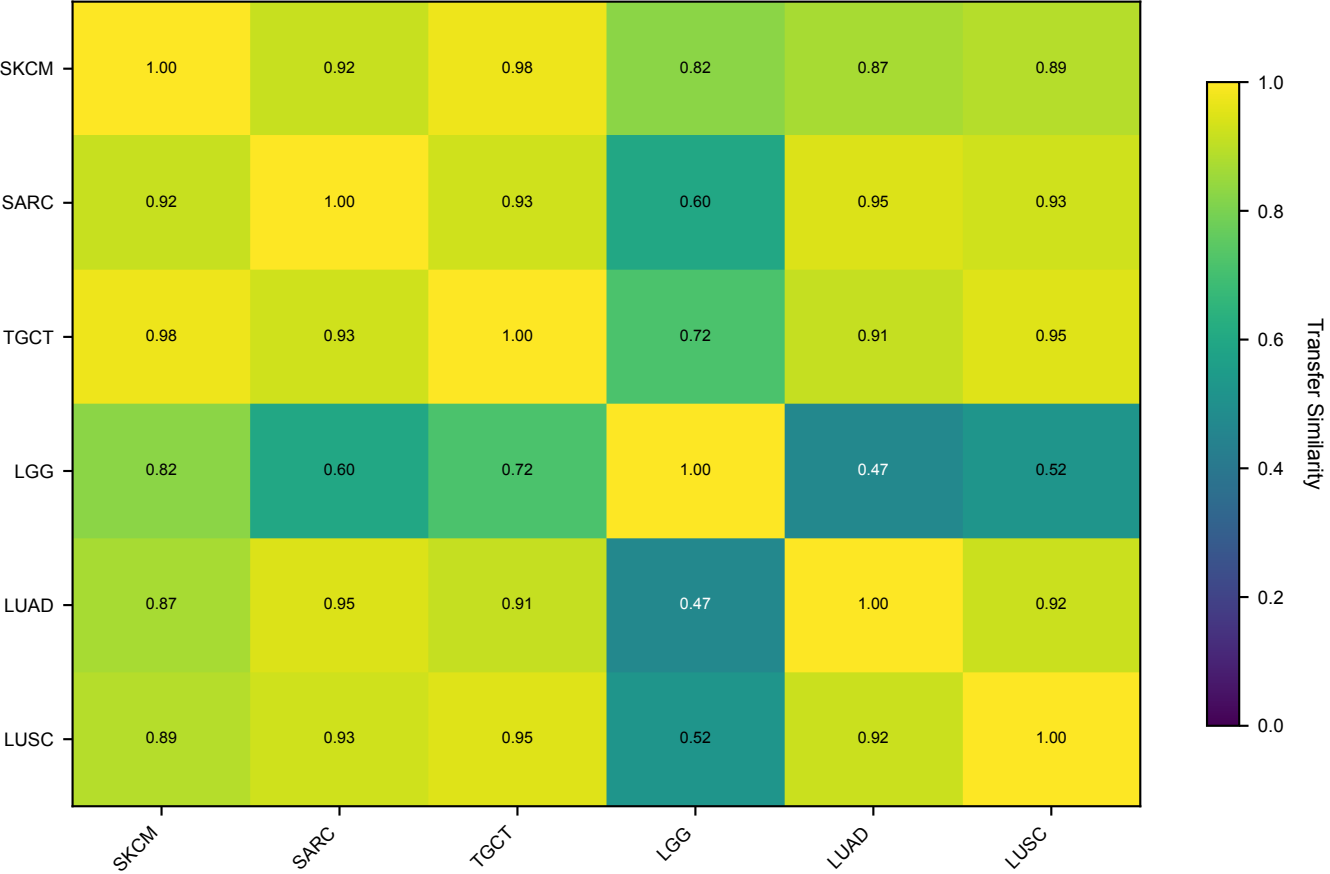

B. Hierarchical Clustering

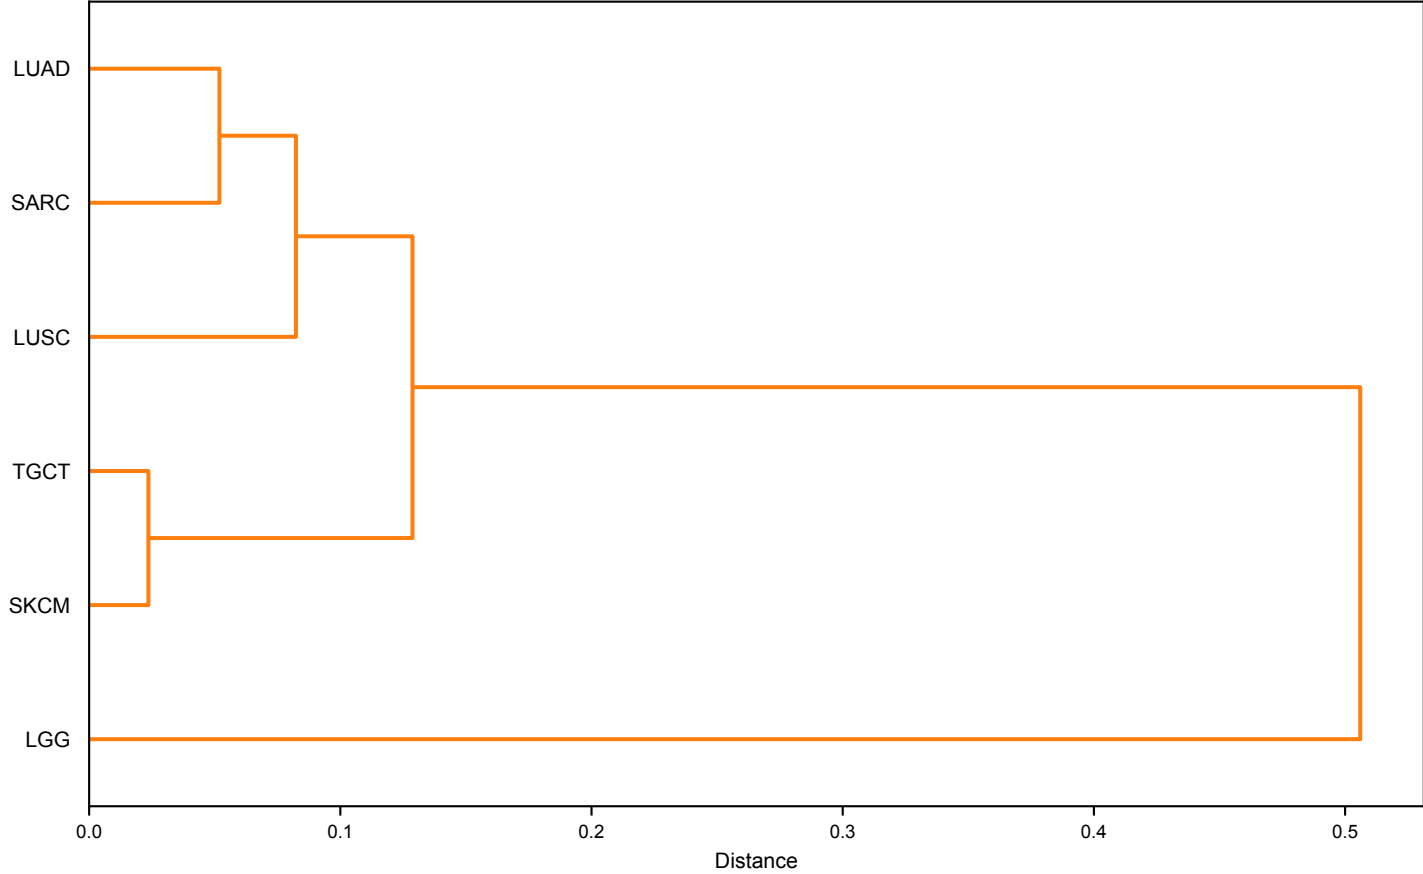

C. Transfer Learning Performance Matrix

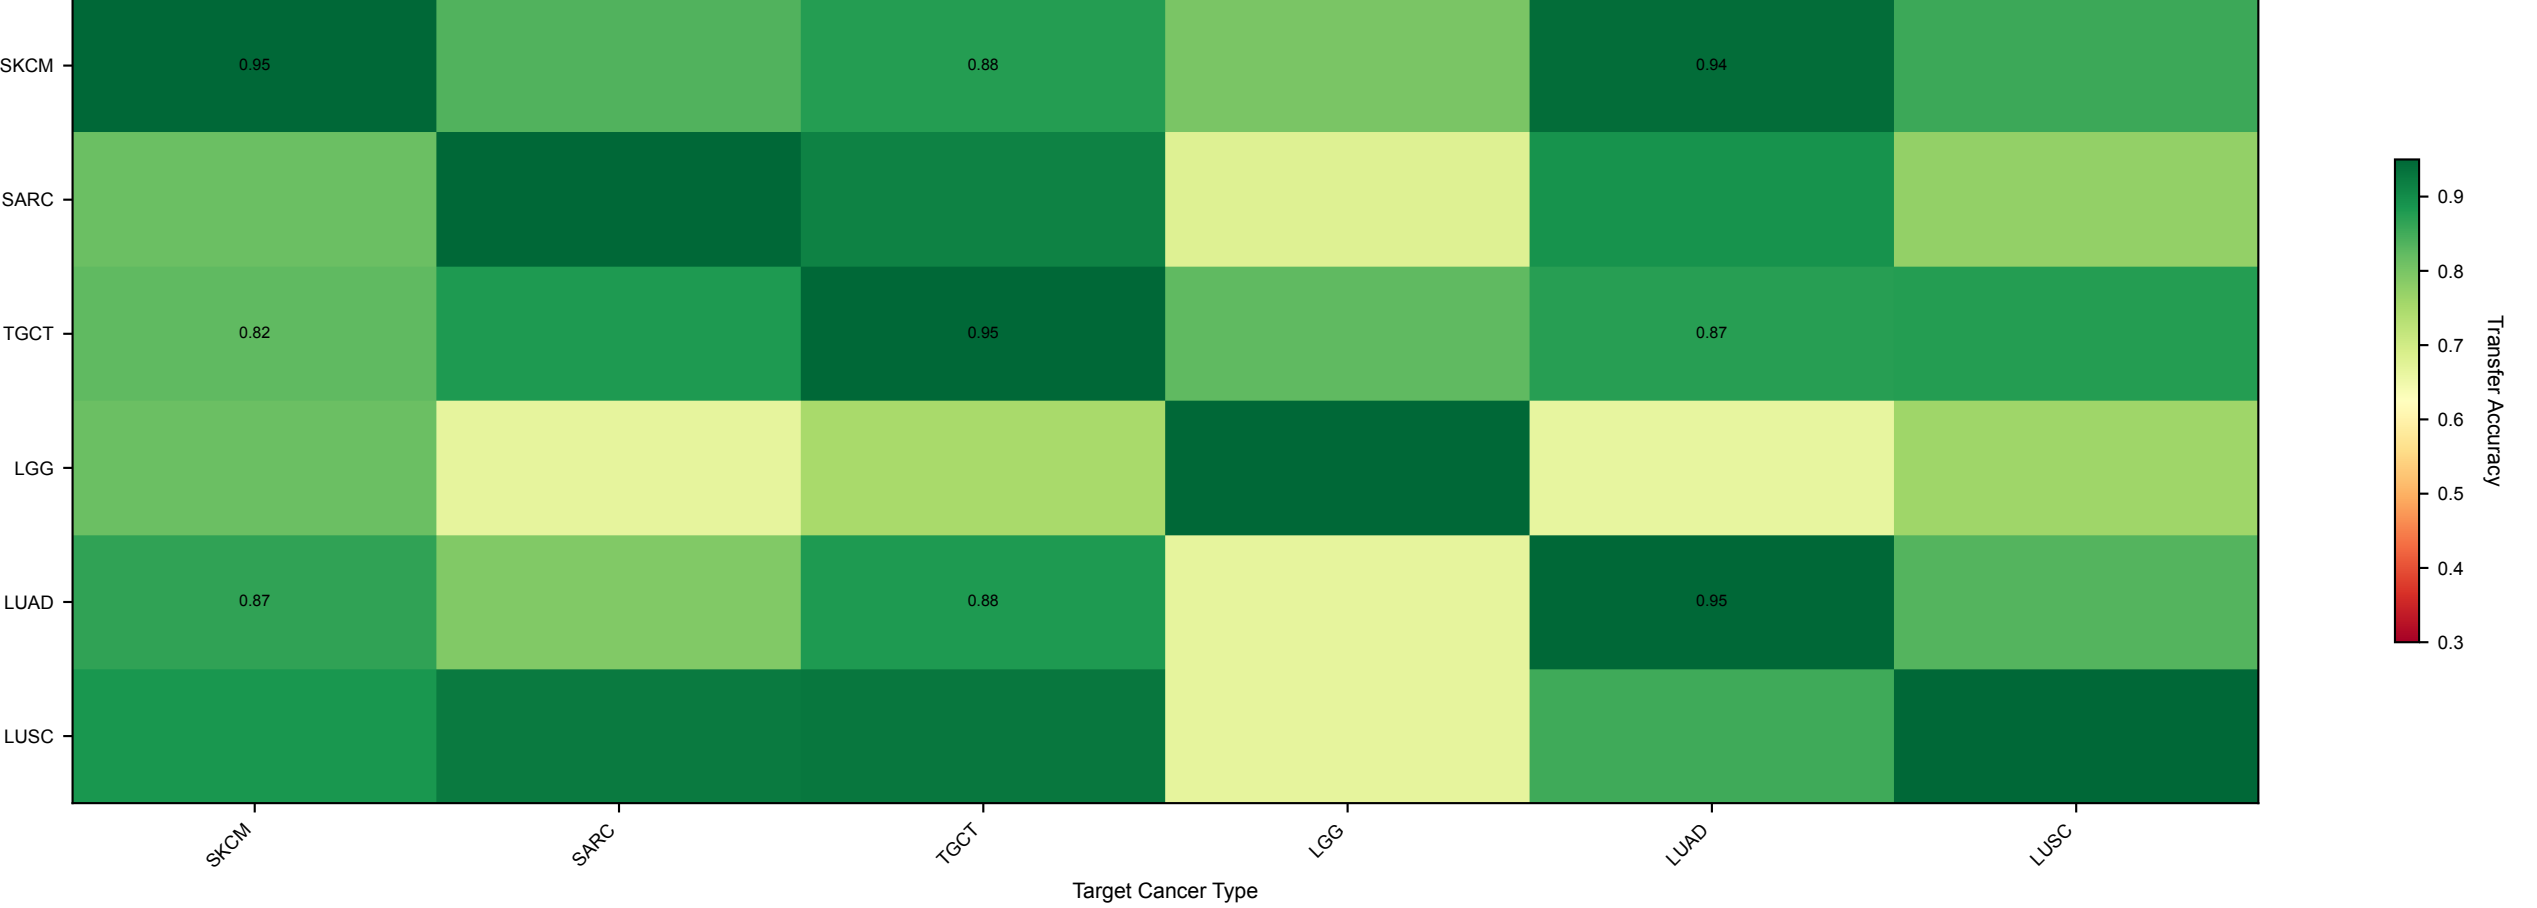

Supplement: supplementary_material [file Figure4_Cross_Cancer_Transferability.pdf › SupplementaryMaterials/code/Figure4_Cross_Cancer_Transferability.pdf]
