# Supplementary material
Source: ML conference proceedings conference paper supplement (https://openreview.net/forum?id=oALqqvTcMt)

A. Known vs Discovered Pathways

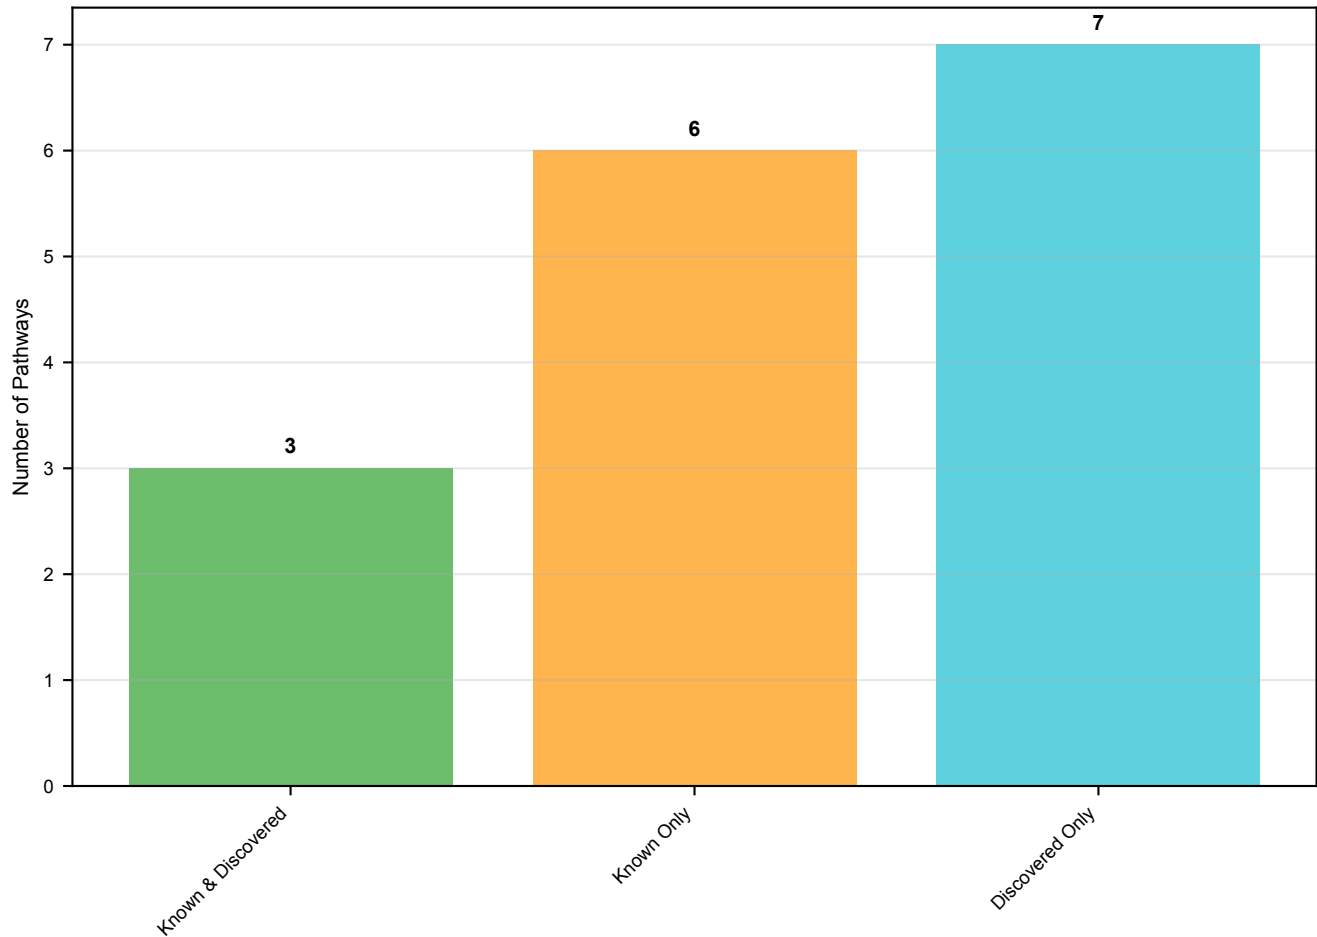

B. Clinical Relevance Analysis

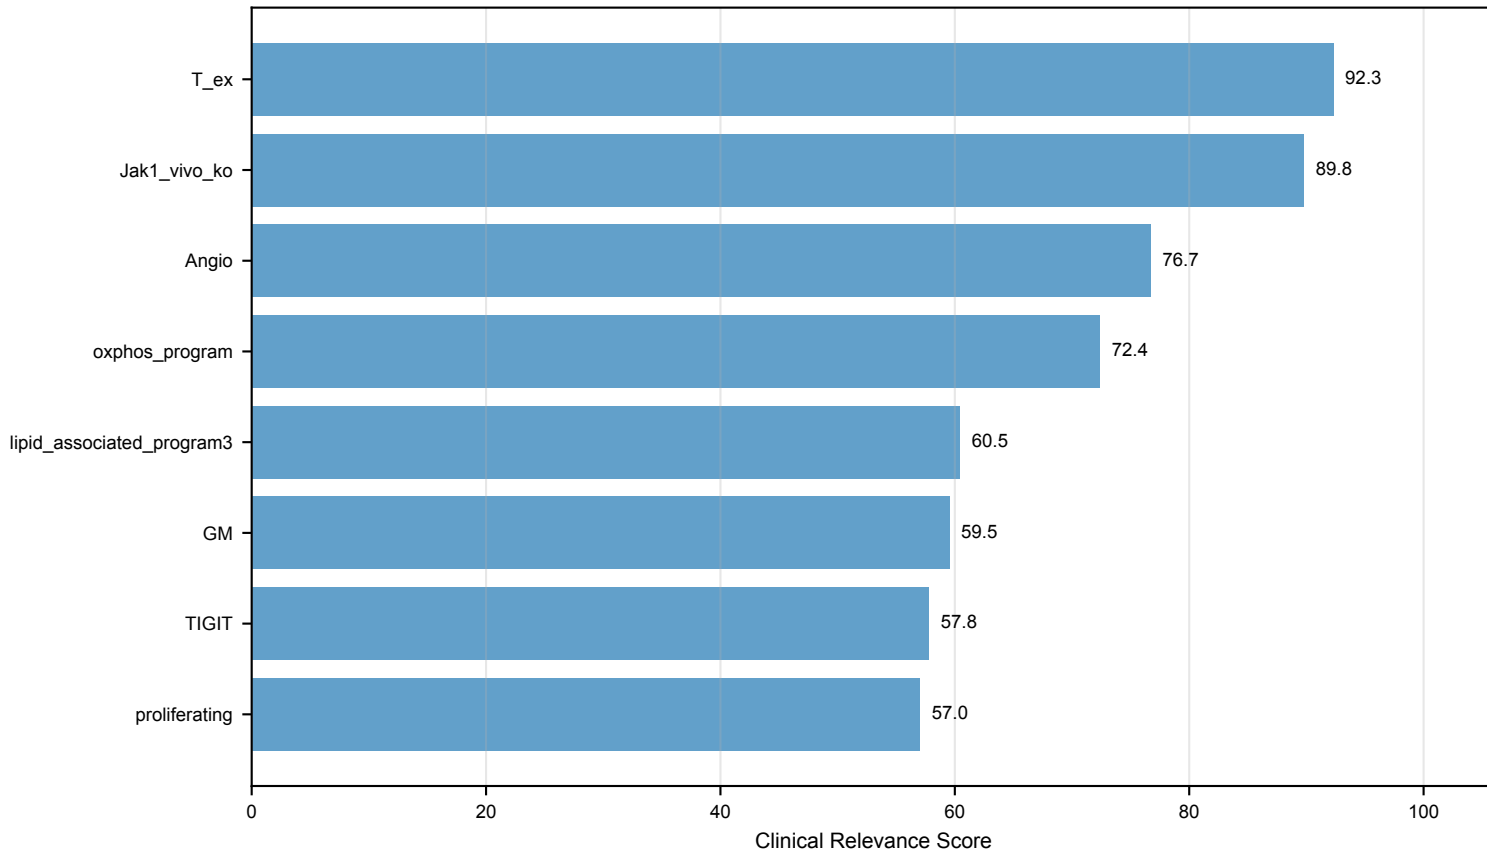

C. Comparison with Literature Findings

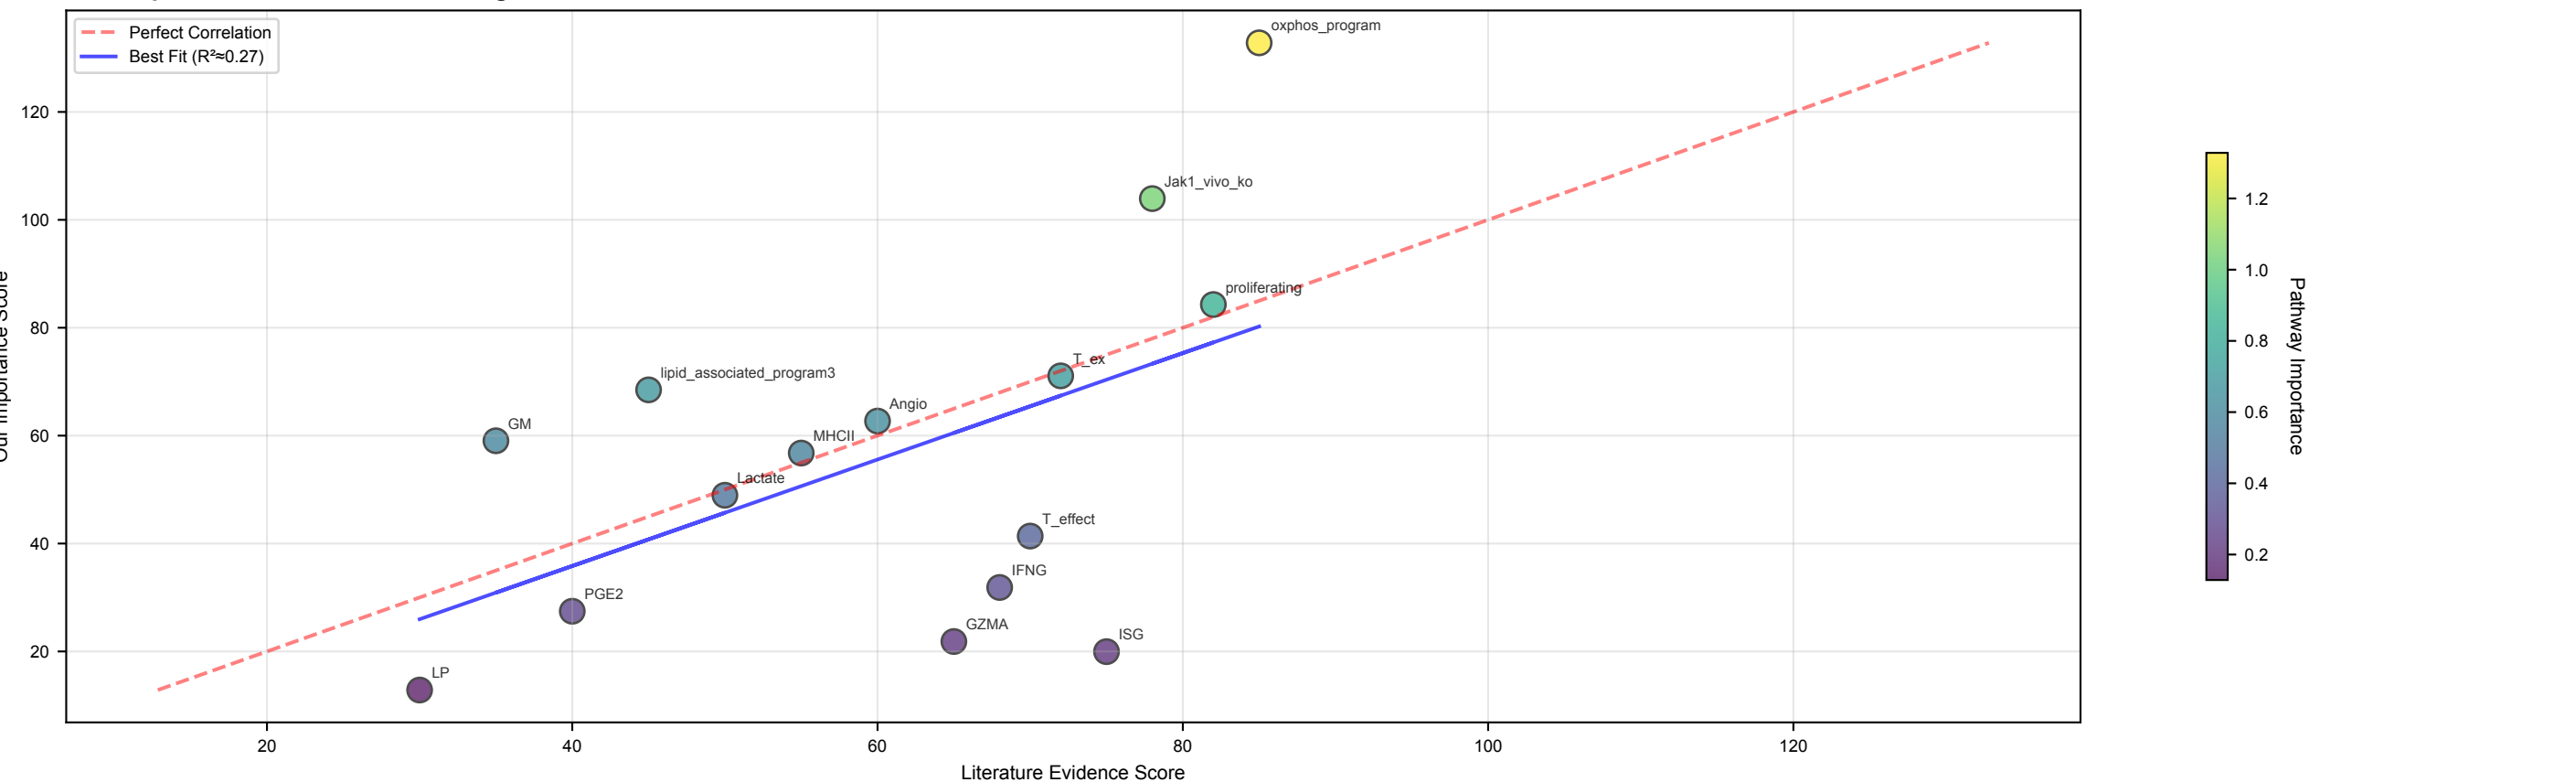

Supplement: supplementary_material [file Figure5_Biological_Validation.pdf › SupplementaryMaterials/code/Figure5_Biological_Validation.pdf]
