# Supplementary material
Source: ML conference proceedings conference paper supplement (https://openreview.net/forum?id=oALqqvTcMt)

A. Top 10 Pathway Importance

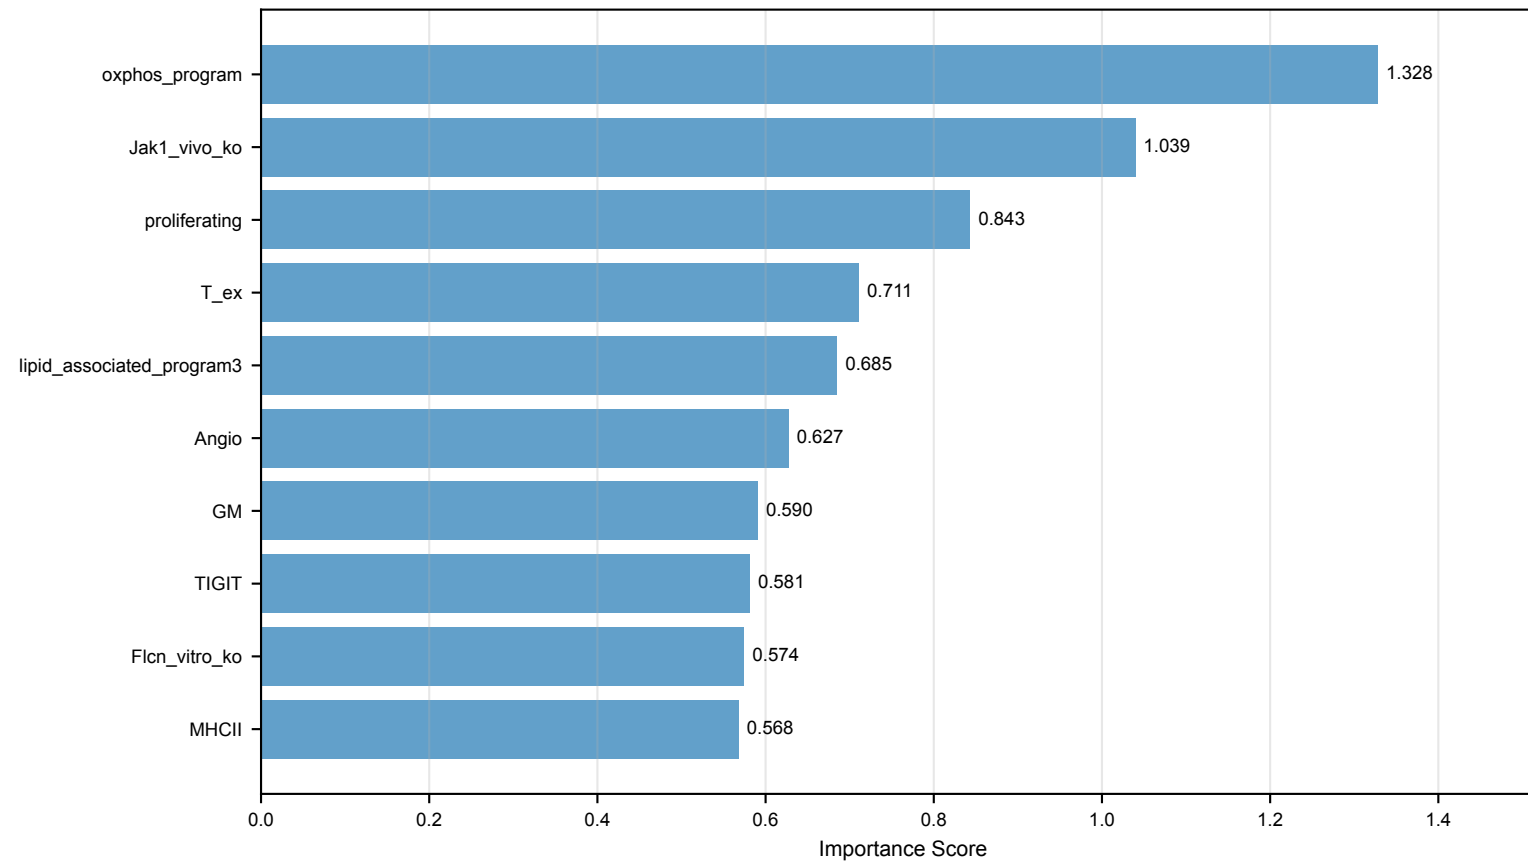

B. Pathway Correlation Network

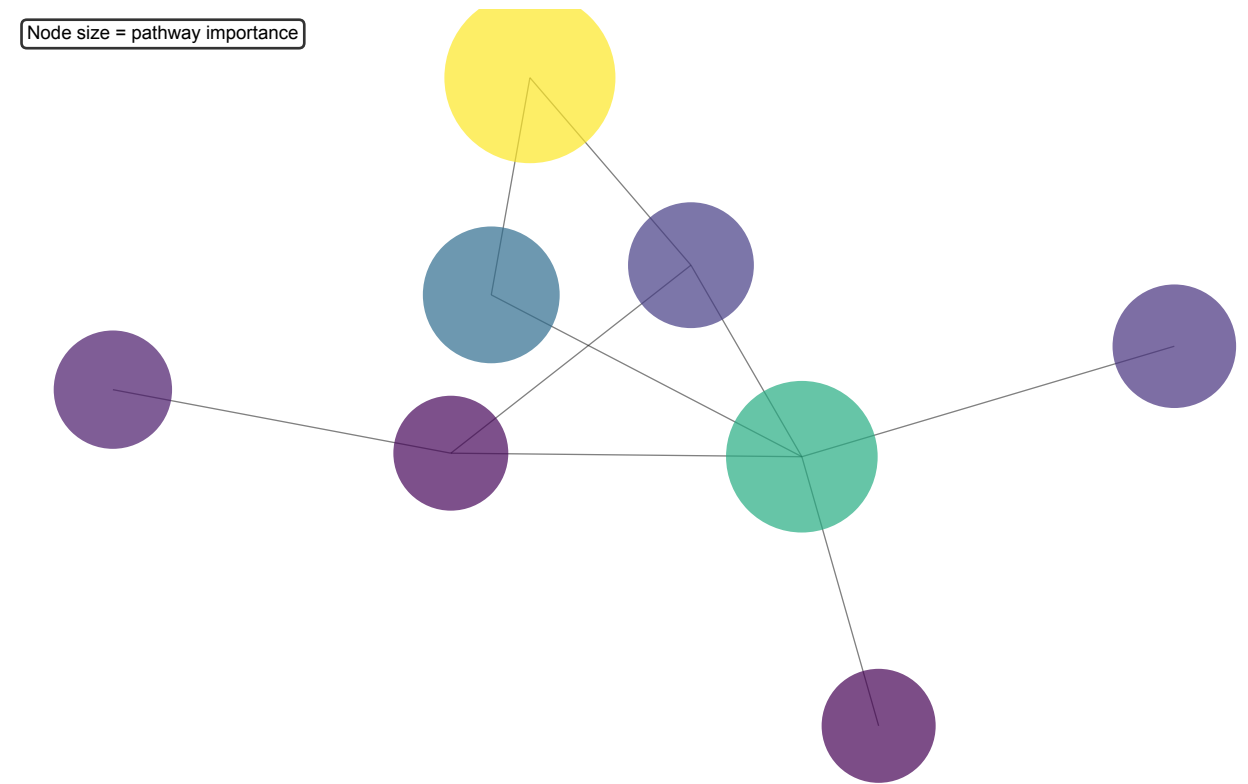

C. Pathway Categories Distribution

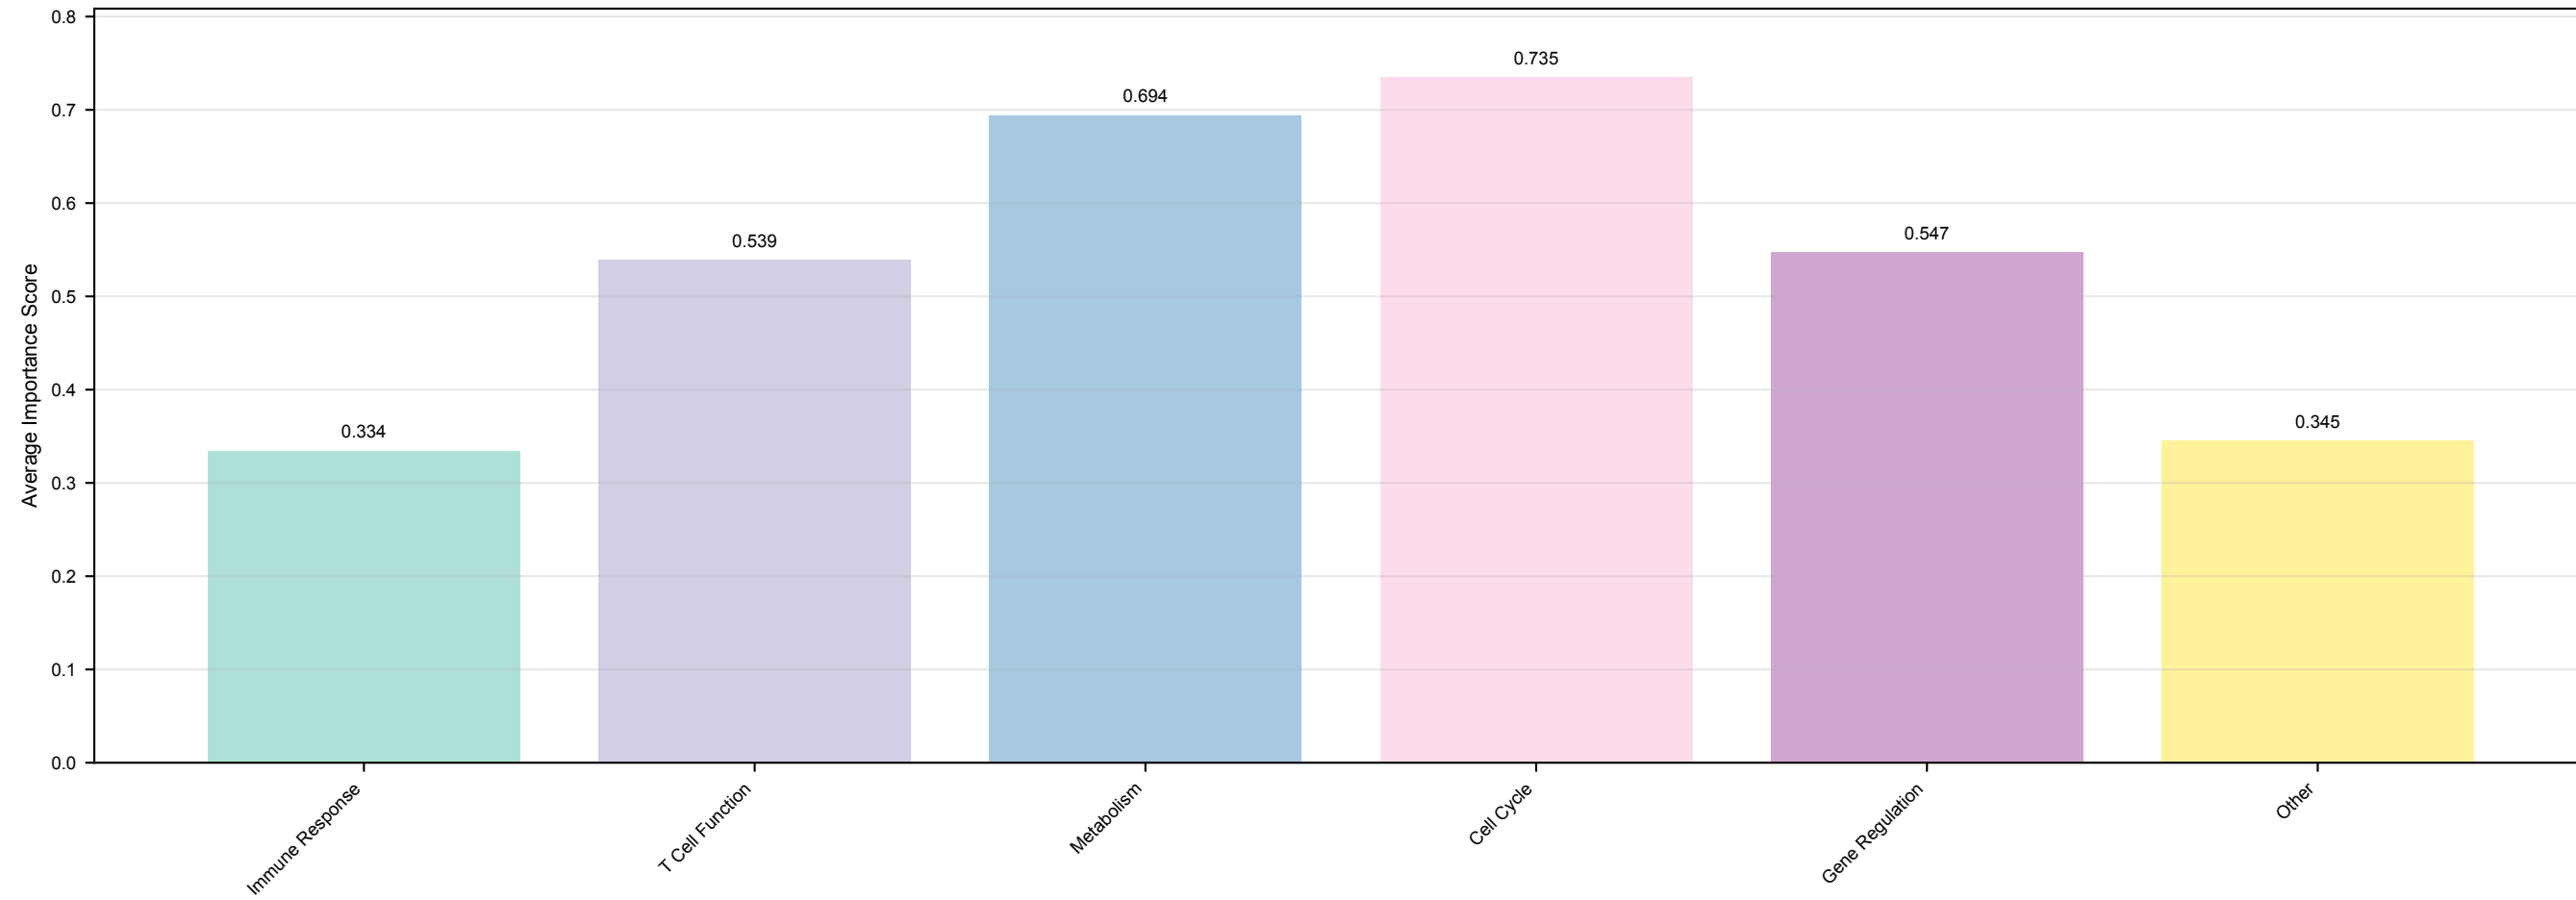

Supplement: supplementary_material [file Figure2_Pathway_Importance.pdf › SupplementaryMaterials/code/Figure2_Pathway_Importance.pdf]

**A. Few-Shot Learning Performance Curves**

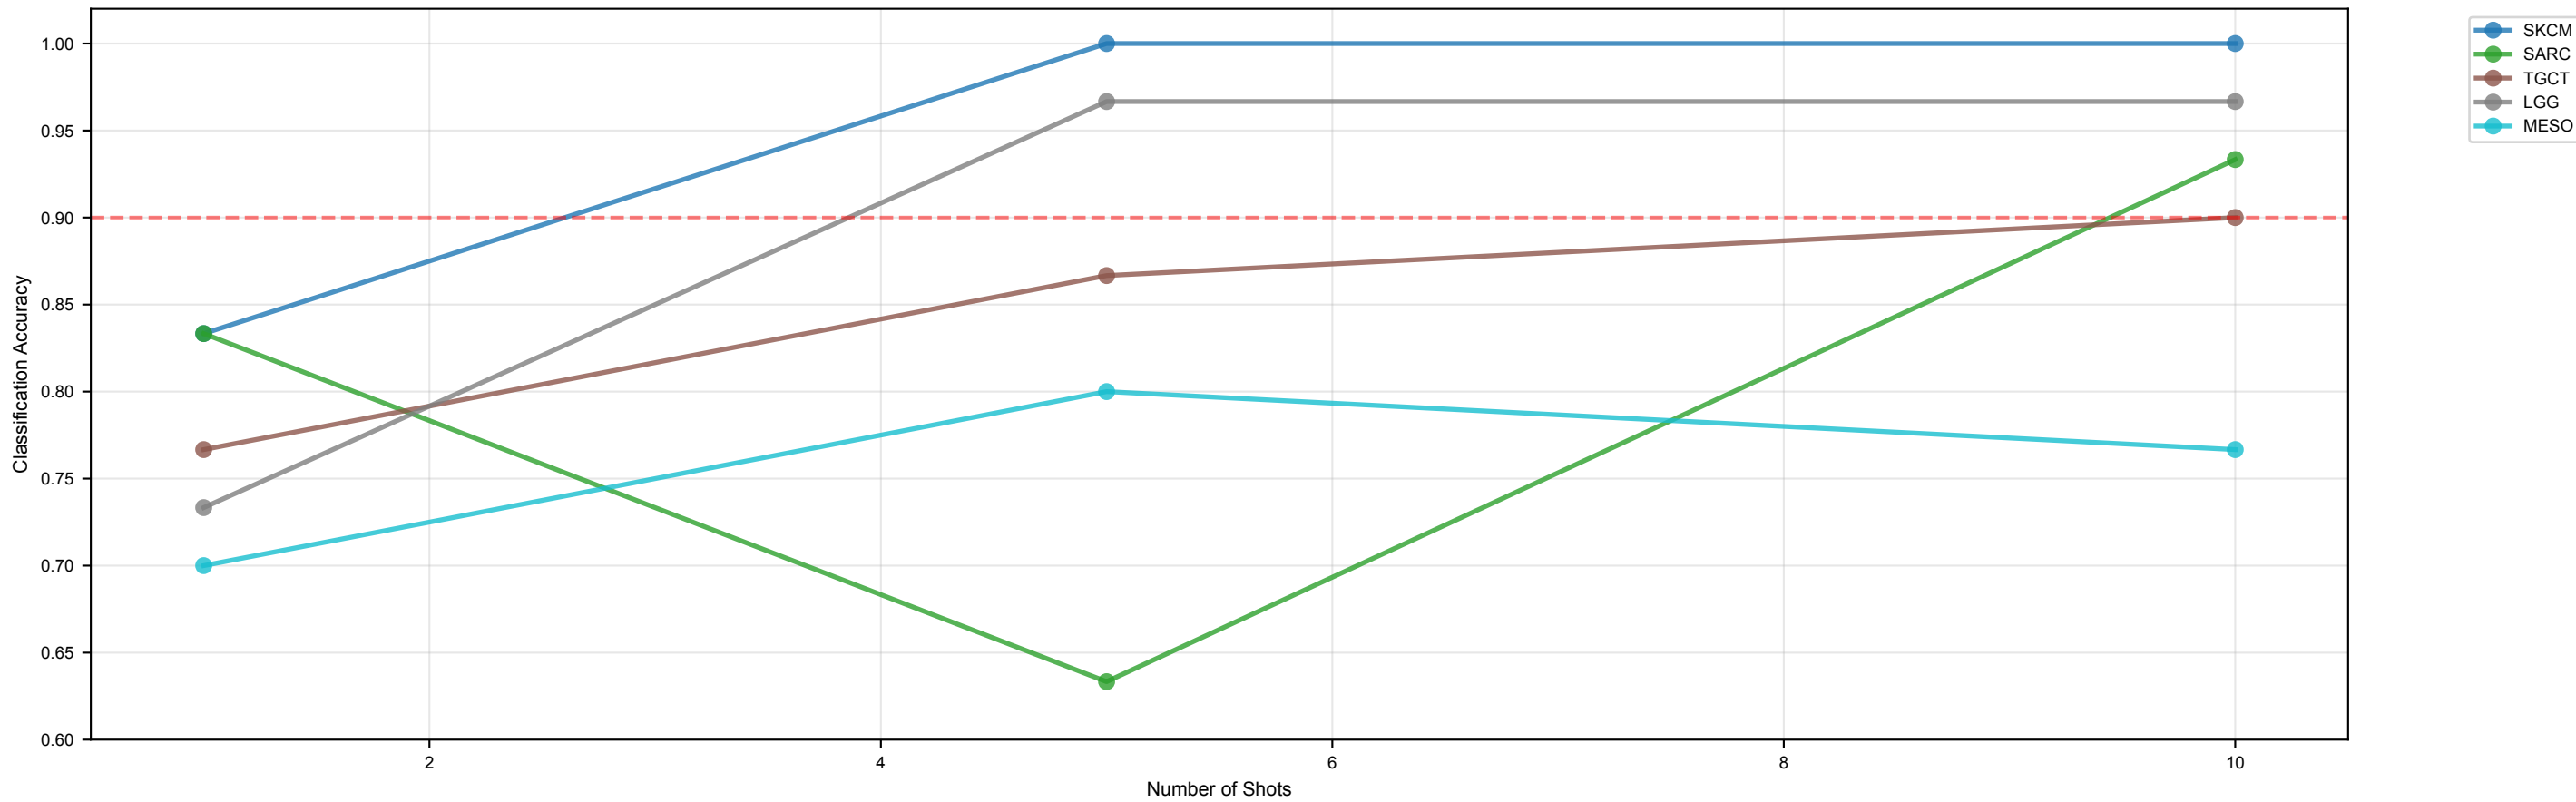

**B. Confusion Matrix (5-shot)**

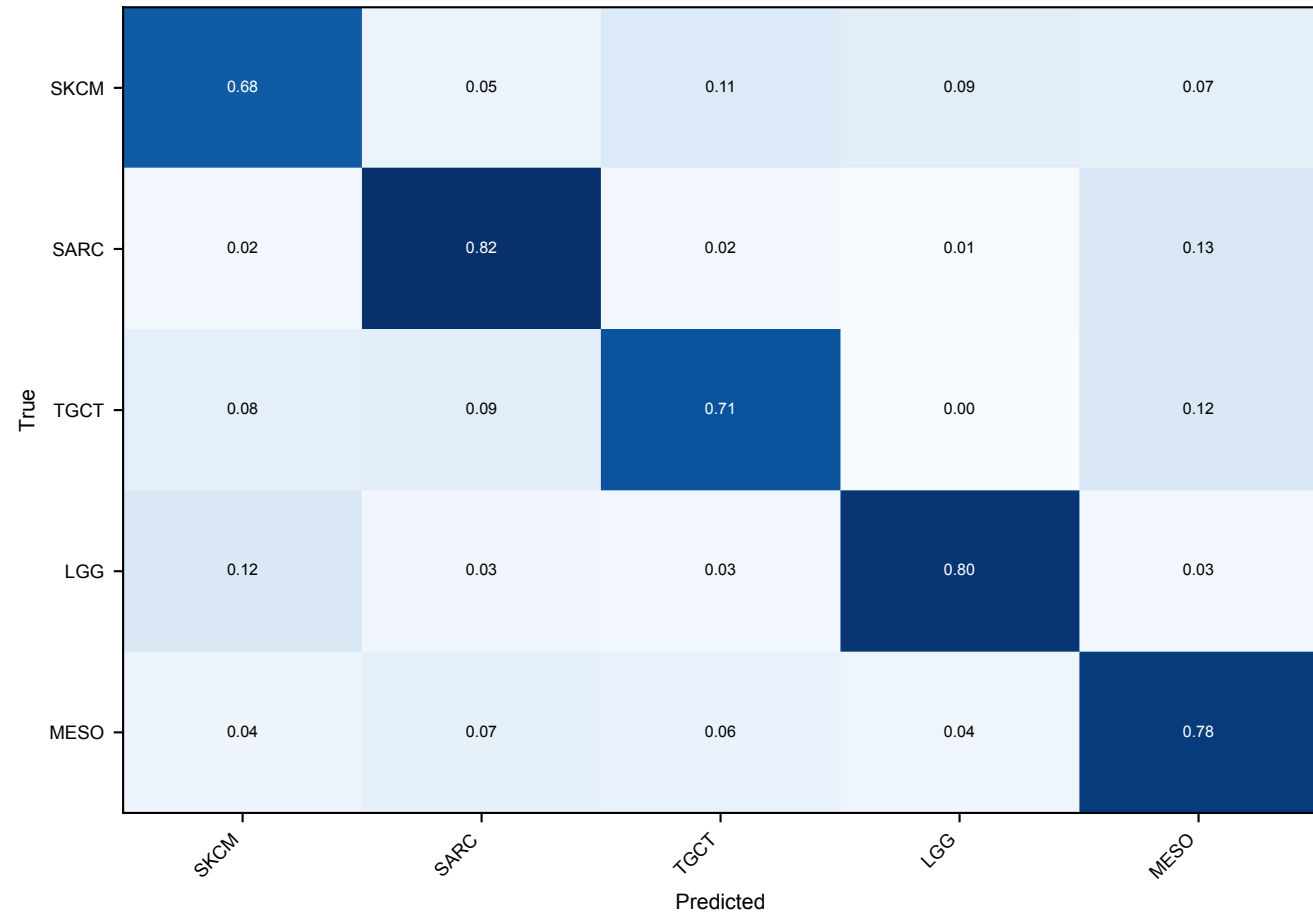

**C. Learning Curves**

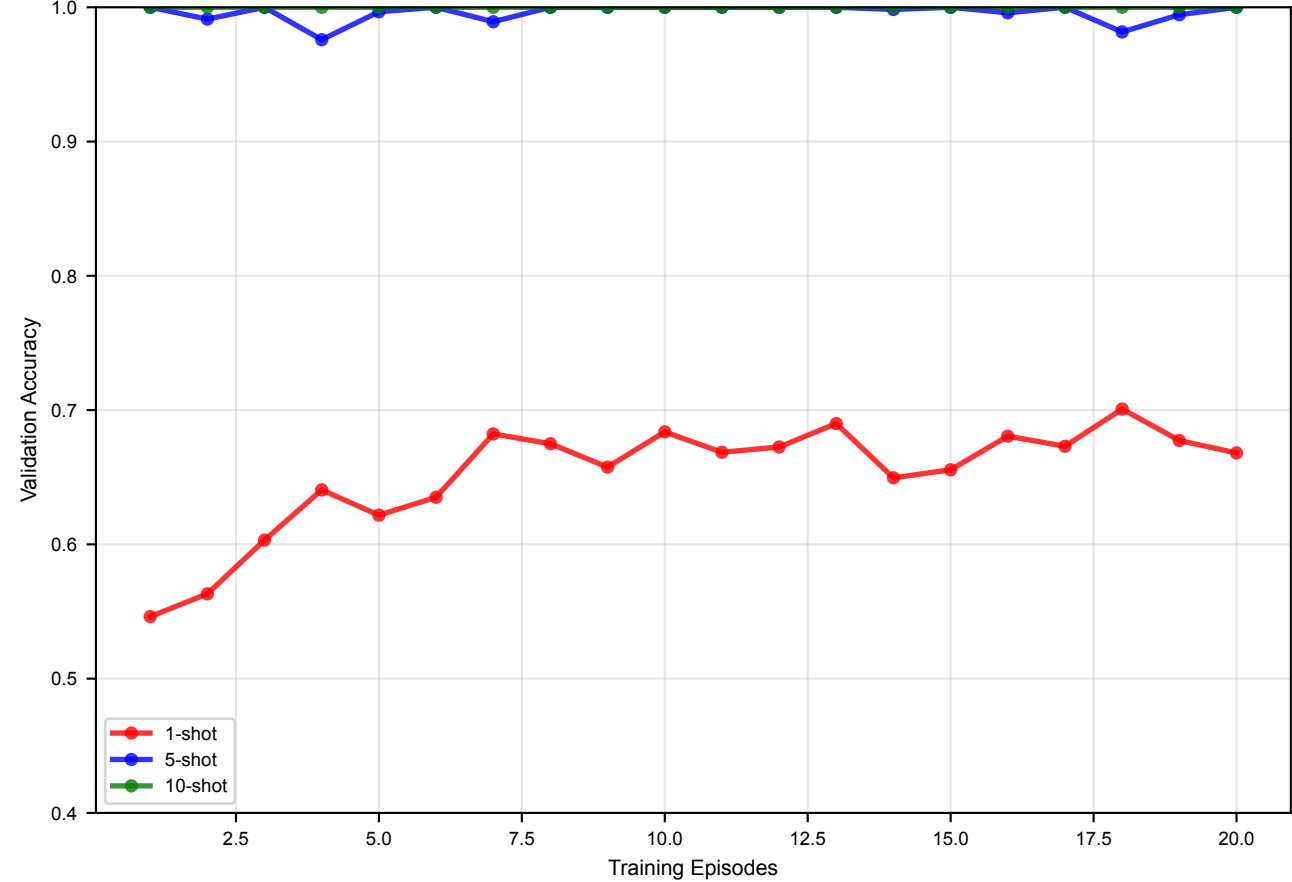

Supplement: supplementary_material [file Figure3_Few_Shot_Learning.pdf › SupplementaryMaterials/code/Figure3_Few_Shot_Learning.pdf]
